# Supplementary material
Source: Springer Nature journal article supplement (https://www.springermedizin.de/resource/supplementary/12961_2011_229_MOESM1_ESM.pdf/9570834)
Supplement: MOESM1 [file 9570834]

## **TECHNICAL & ETHICAL REVIEW BOARD**

- Functions as an Institutional Review Board
- Gives feedback on technical aspects of research proposals

## **DATABASE & INFRASTRUCTURE**

- Maintains library of research and reports from health research in Timor-Leste
- Provides access to major journals in biomedical and related social sciences through the WHO HINARI Programme

## **TRAINING**

- Provides PhD scholarships in health research through external grants
- Conducts research workshops and seminars
- Encourages Timorese research assistants to participate in all health research

## **RESEARCH**

- Identifies areas of research priority
- Coordinates and conducts research activities in priority areas
- Ensures research findings inform policy and programs
